# Supplementary material for: Breathing Planet Earth: Analysis of Keeling’s Data on CO2 and O2 with Respiratory Quotient (RQ), Part I: Global Respiratory Quotient (RQGlob) of Earth
Source: MDPI journal article supplement (doi:10.3390/en17020299), 2024-01-07
Supplement: s1 [file s1]

Archive with 1 entries (1 files):
- energies-2617157-supplementary.pdf
