# Supplementary material for: Breathing Planet Earth: Analysis of Keeling’s Data on CO2 and O2 with Respiratory Quotient (RQ), Part I: Global Respiratory Quotient (RQGlob) of Earth
Source: MDPI journal article supplement (doi:10.3390/en17020299), 2024-01-07
Supplement: s1 [file s1 › energies-2617157-supplementary.pdf]

**SUPPLEMENT ON CURVE FIT PROCEDURE for the article  
titled "Breathing Planet Earth: Global Respiratory Quotient  
(RQGlob) from Keeling's Data and CO2-Budget among the  
Atmosphere, Land and Oceans . Part I: Brief Review on RQ and  
Global Respiratory Quotient of Earth"**

Supplement describes the procedure used for obtaining the curve fit constants for Keeling's data

*Curve Fit Constants for Keeling's Curves*

**a) Curve Fit Constants With sawtooth pattern:** Curve fit constants were obtained by plotting Keeling's data vs days/10, days since Jan 1990 .

CO<sub>2</sub> in in ppm =  $a_0' + a_1'x'$  , linear fit ,  $x'$  = days/10, days since 1991,  $a_0'$  = 350.50,  $a_1'$  = 0.057,  $R^2$  = 0.9709

O<sub>2</sub> in ppm =  $b_0' + b_1'x'$  linear fit,  $x'$  = days/10,  $b_0'$  = 209488,  $b_1'$  = -0.1216,  $R^2$  = 0.9839

CO<sub>2</sub> in ppm =  $c_0' + c_1'x' + c_2'x'^2$  for quadratic fit,  $x'$  = days/10,  $c_0'$  = 354.08,  $c_1'$  = 0.04036,  $c_2'$  =  $1.5175 \times 10^{-5}$ ,  $R^2$  = 0.9804

O<sub>2</sub> in ppm =  $d_0' + d_1'x' + d_2'x'^2$  where  $x'$  = days/10,  $d_0'$  = 209,480,  $d_1'$  = -0.083306,  $d_2'$  =  $3.2631 \times 10^{-5}$ ,  $R^2$  = 0.9896

by using  $x' = x \cdot (365/10)$  where  $x$  is in years,

CO<sub>2</sub> in in ppm =  $a_0 + a_1x$ , linear fit,  $x$  in years since 1991,  $a_0 = a_0' = 350.5$  ppm,  $a_1 = a_1' \cdot (365/10) = 2.0805$  ppm/year,  $R^2$  = 0.9709

This checks with 2 ppm/year in Ref. [1]

O<sub>2</sub> in ppm =  $b_0 + b_1x$  linear fit,  $x$  in years since 1991,  $b_0 = b_0' = 209,488$  ppm,  $b_1 = b_1' \cdot (365/10) = -4.4384$  ppm/year,  $R^2$  = 0.9839

The 4.438 ppm/year is close to 4 ppm/year quoted in Ref. [1].

CO<sub>2</sub> in ppm =  $c_0 + c_1x + c_2x^2$  for quadratic fit,  $x$  in years since 1991,  $c_0 = c_0' = 350.5$  ppm,  $c_1 = c_1' \cdot (365/10) = 1.4731$  ppm/year,  $c_2 = c_2' \cdot (365/10)^2 = 0.01889$  ppm/year<sup>2</sup>,  $R^2$  = 0.9804

O<sub>2</sub> in ppm =  $d_0 + d_1x + d_2x^2$ ,  $x$  in years since 1991,  $d_0 = d_0' = 209,480$  ppm,  $d_1 = d_1' \cdot (365/10) = -3.0407$  ppm/year,  $d_2 = d_2' \cdot (365/10)^2 = -0.04347$  ppm/year<sup>2</sup>,  $R^2$  = 0.9896

**b) Curve Fit Constants Based on Annual Average Concentrations of CO<sub>2</sub> and O<sub>2</sub> (Without Saw-tooth Pattern):**

Curve fit constants were obtained by averaging concentrations over the whole year then plotting the results for CO<sub>2</sub> and O<sub>2</sub> vs year.

CO<sub>2</sub> in in ppm =  $a_0 + a_1x$ , linear fit,  $x$  in years since 1991,  $a_0 = 349.94$  ppm,  $a_1 = 2.045$  ppm/year,  $R^2$  = 0.9944

This checks with 2 ppm/year in Ref. [1]

O<sub>2</sub> in ppm =  $b_0 + b_1x$  linear fit,  $x$  in years since 1991,  $b_0 = 209,488$  ppm,  $b_1 = -4.3486$  ppm/year,  $R^2$  = 0.9937

The 4.3486 ppm/year is close to 4 ppm/year quoted in Ref. [1].

CO<sub>2</sub> in ppm =  $c_0 + c_1x + c_2x^2$  for quadratic fit,  $x$  in years since 1991,  $c_0 = 353.09$  ppm,  $c_1 = 1.4544$  ppm/year,  $c_2 = 0.01905$  ppm/year<sup>2</sup>,  $R^2$  = 0.99954

O<sub>2</sub> in ppm =  $d_0 + d_1x + d_2x^2$ ,  $x$  in years since 1991,  $d_0 = d_0' = 209481$  ppm,  $d_1 = -2.9998$  ppm/year,  $d_2 = -0.0435$  ppm/year<sup>2</sup>,  $R^2$  = 0.9997

## References

- [1] Duursma, E. K., & Boission, M. P. R. M. , "Global oceanic and atmospheric oxygen stability considered in relation to the carbon cycle and to different time scales.," *Oceanologica Acta*, vol. 17, pp. 117-141, 1994.
